# Supplementary material for: Mechanistic dissection of the PD-L1:B7-1 co-inhibitory immune complex
Source: PubMed Central journal article supplement (PMC7272049; doi:10.1371/journal.pone.0233578), 2020-06-04
Supplement: pone.0233578.s002.pdf [file pone.0233578.s002.pdf]

Figure S1

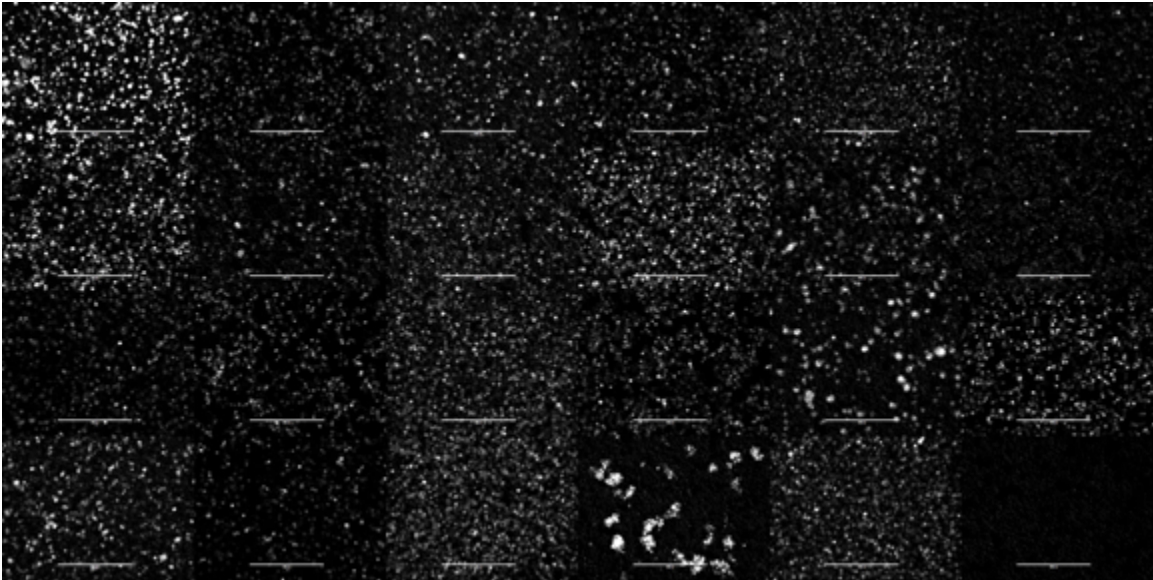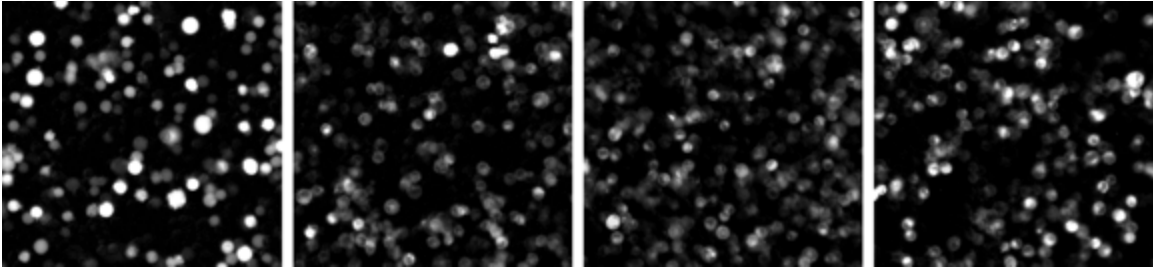

Cytosolic mCherry

PD-1 mCherry

ICOS-L mCherry

CD200 mCherry
