# Supplementary material for: Mechanistic dissection of the PD-L1:B7-1 co-inhibitory immune complex
Source: PubMed Central journal article supplement (PMC7272049; doi:10.1371/journal.pone.0233578), 2020-06-04
Supplement: pone.0233578.s019.pdf [file pone.0233578.s019.pdf]

Table S1

|         | <b>PD-1</b> | <b>B7-1</b> |
|---------|-------------|-------------|
| WT      | +           | +           |
| mCherry | -           | -           |
| D49A    | +           | +           |
| D49R    | +           | R           |
| L53R    | -           | -           |
| V54D    | R           | R           |
| V54A    | +           | +           |
| Y56A    | +           | -           |
| Y56D    | +           | -           |
| Q66A    | +           | +           |
| Q66D    | +           | R           |
| E72A    | +           | +           |
| E72R    | +           | -           |
| G119D   | +           | -           |
| G119R   | -           | -           |
| G120D   | +           | -           |
| A121R   | -           | -           |
| D122A   | -           | +           |
| Y123A   | -           | +           |
| Y123R   | -           | +           |
| K124A   | -           | +           |
| K124D   | -           | +           |
| R125A   | R           | +           |
| R125D   | -           | +           |
