# Supplementary material for: Mechanistic dissection of the PD-L1:B7-1 co-inhibitory immune complex
Source: PubMed Central journal article supplement (PMC7272049; doi:10.1371/journal.pone.0233578), 2020-06-04
Supplement: pone.0233578.s020.pdf [file pone.0233578.s020.pdf]

|         | <b>PD-1</b> | <b>B7-1</b> |
|---------|-------------|-------------|
| WT      | 1.00        | 1.00        |
| mCherry | 0.02 ± 0.02 | 0.10 ± 0.06 |
| D26A    | 0.54 ± 0.26 | 0.93 ± 0.03 |
| D26R    | 0.42 ± 0.07 | 0.96 ± 0.06 |
| T37A    | 0.31 ± 0.03 | 0.26 ± 0.04 |
| T37R    | 0.22 ± 0.11 | 0.17 ± 0.07 |
| D49R    | 0.86 ± 0.06 | 0.31 ± 0.06 |
| L53D    | 0.16 ± 0.10 | 0.09 ± 0.04 |
| L53R    | 0.14 ± 0.10 | 0.10 ± 0.05 |
| V54D    | 0.88 ± 0.12 | 0.30 ± 0.04 |
| V54R    | 0.95 ± 0.04 | 0.49 ± 0.07 |
| Y56A    | 1.07 ± 0.16 | 0.08 ± 0.04 |
| Y56D    | 0.77 ± 0.10 | 0.07 ± 0.03 |
| Y56R    | 0.64 ± 0.13 | 0.11 ± 0.06 |
| Q66D    | 1.05 ± 0.07 | 0.54 ± 0.06 |
| E72D    | 0.55 ± 0.07 | 0.56 ± 0.10 |
| E72R    | 0.48 ± 0.15 | 0.11 ± 0.05 |
| I115D   | 0.02 ± 0.01 | 0.05 ± 0.03 |
| I116R   | 0.01 ± 0.01 | 0.01 ± 0.01 |
| G119D   | 1.40 ± 0.20 | 0.08 ± 0.04 |
| G119R   | 0.29 ± 0.10 | 0.02 ± 0.01 |
| G120A   | 0.02 ± 0.01 | 0.01 ± 0.01 |
| G120D   | 0.84 ± 0.20 | 0.05 ± 0.04 |
| G120R   | 0.05 ± 0.03 | 0.04 ± 0.04 |
| A121D   | 0.03 ± 0.03 | 0.03 ± 0.03 |
| A121R   | 0.03 ± 0.03 | 0.03 ± 0.03 |
| D122A   | 0.01 ± 0.01 | 0.74 ± 0.12 |
| D122R   | 0.01 ± 0.01 | 0.01 ± 0.01 |
| Y123A   | 0.01 ± 0.01 | 0.65 ± 0.08 |
| Y123D   | 0.01 ± 0.01 | 0.33 ± 0.16 |
| Y123R   | 0.01 ± 0.01 | 1.12 ± 0.04 |
| K124A   | 0.02 ± 0.01 | 0.94 ± 0.06 |
| K124D   | 0.03 ± 0.01 | 0.48 ± 0.05 |
| K124R   | 0.02 ± 0.01 | 0.85 ± 0.08 |
| R125A   | 0.03 ± 0.04 | 1.03 ± 0.02 |
| R125D   | 0.02 ± 0.01 | 1.12 ± 0.08 |
