# Supplementary material for: Mechanistic dissection of the PD-L1:B7-1 co-inhibitory immune complex
Source: PubMed Central journal article supplement (PMC7272049; doi:10.1371/journal.pone.0233578), 2020-06-04
Supplement: pone.0233578.s021.pdf [file pone.0233578.s021.pdf]

Table S3

|       | PD-L1       | CTLA-4      | CD28        |
|-------|-------------|-------------|-------------|
| WT    | 1.00        | 1.00        | 1.00        |
| K44A  | 0.46 ± 0.02 | 0.96 ± 0.02 | 0.92 ± 0.05 |
| K44D  | 0.01 ± 0.00 | 0.89 ± 0.04 | 0.47 ± 0.11 |
| K47A  | 0.36 ± 0.02 | 0.97 ± 0.01 | 0.90 ± 0.05 |
| K47D  | 0.02 ± 0.00 | 0.98 ± 0.01 | 0.94 ± 0.03 |
| D48R  | 0.15 ± 0.05 | 0.82 ± 0.08 | 0.49 ± 0.07 |
| K49A  | 0.03 ± 0.01 | 0.90 ± 0.09 | 0.90 ± 0.10 |
| K49D  | 0.02 ± 0.02 | 0.93 ± 0.07 | 0.90 ± 0.07 |
| R67D  | 0.73 ± 0.07 | 0.03 ± 0.02 | 0.02 ± 0.01 |
| Y69A  | 0.56 ± 0.05 | 0.88 ± 0.02 | 0.09 ± 0.04 |
| Y69D  | 0.47 ± 0.10 | 0.03 ± 0.02 | 0.00 ± 0.00 |
| Q71A  | 0.80 ± 0.05 | 0.94 ± 0.03 | 0.03 ± 0.02 |
| Q71D  | 0.22 ± 0.10 | 0.87 ± 0.04 | 0.01 ± 0.01 |
| L85D  | 0.20 ± 0.07 | 0.97 ± 0.01 | 0.71 ± 0.11 |
| W88A  | 0.82 ± 0.10 | 0.98 ± 0.01 | 0.57 ± 0.12 |
| W88D  | 0.78 ± 0.03 | 0.97 ± 0.01 | 0.38 ± 0.02 |
| N93A  | 0.19 ± 0.06 | 0.92 ± 0.06 | 0.87 ± 0.11 |
| L96A  | 0.02 ± 0.01 | 0.95 ± 0.02 | 0.89 ± 0.10 |
| T101A | 0.28 ± 0.07 | 0.90 ± 0.04 | 0.69 ± 0.05 |
| L107A | 0.03 ± 0.02 | 0.90 ± 0.09 | 0.93 ± 0.03 |
| L107D | 0.02 ± 0.01 | 0.94 ± 0.06 | 0.93 ± 0.03 |
| R114D | 0.22 ± 0.06 | 0.94 ± 0.02 | 0.85 ± 0.08 |
| S118D | 0.09 ± 0.06 | 0.89 ± 0.08 | 0.48 ± 0.11 |
| V120A | 0.71 ± 0.06 | 0.62 ± 0.44 | 0.05 ± 0.02 |
| V120D | 0.09 ± 0.05 | 0.06 ± 0.05 | 0.01 ± 0.01 |
| Q122A | 0.82 ± 0.10 | 0.95 ± 0.03 | 0.28 ± 0.08 |
| Q122D | 0.25 ± 0.06 | 0.04 ± 0.04 | 0.01 ± 0.01 |
| K123D | 0.12 ± 0.05 | 0.92 ± 0.07 | 0.43 ± 0.08 |
| Y129A | 0.35 ± 0.05 | 0.88 ± 0.05 | 0.19 ± 0.01 |
| Y129D | 0.43 ± 0.06 | 0.73 ± 0.11 | 0.02 ± 0.01 |
| V131D | 0.64 ± 0.03 | 0.06 ± 0.00 | 0.01 ± 0.01 |
| K132D | 0.30 ± 0.06 | 0.93 ± 0.01 | 0.76 ± 0.04 |
| L134D | 0.51 ± 0.13 | 0.96 ± 0.02 | 0.29 ± 0.03 |
| K142D | 0.24 ± 0.09 | 0.93 ± 0.00 | 0.83 ± 0.00 |
| K173D | 0.41 ± 0.18 | 0.78 ± 0.14 | N/D         |
| D195A | 0.37 ± 0.04 | 0.75 ± 0.11 | N/D         |
| S198A | 0.15 ± 0.03 | 0.63 ± 0.16 | N/D         |
| S198D | 0.44 ± 0.02 | 0.86 ± 0.02 | N/D         |
| S204D | 0.33 ± 0.20 | 0.74 ± 0.21 | N/D         |
| T216D | 0.40 ± 0.01 | 0.86 ± 0.10 | N/D         |
